# Supplementary material
Source: publisher site journal article supplement (https://www.spandidos-publications.com/960/downloadSupplementary)
Supplement: Supplementary file 1 [file downloadSupplementary]

## Sheet: Supplementary Table 3
Table SIII. Co-expression analysis of DEmRNAs and DElncRNAs
	mRNA	lncRNA	r	p
653	AC092835.2	LINC00843	0.428019	3.39e-15
654	AC092835.2	LINC00863	0.414924	2.74e-14
705	AC092835.2	RP11-181E10.3	0.40655	9.96e-14
881	ACTN1	CTD-2003C8.2	0.420672	1.11e-14
962	ACTN1	RP1-93H18.1	0.505029	2.1e-21
976	ACTN1	RP11-167H9.3	0.501182	4.68e-21
983	ACTN1	RP11-221N13.3	0.582636	1.75e-29
985	ACTN1	RP11-253E3.3	0.402096	1.95e-13
1022	ACTN1	RP11-404O13.1	0.426595	4.27e-15
1024	ACTN1	RP11-417E7.1	0.449231	9.41e-17
1063	ACTN1	RP11-890B15.2	0.52935	1.03e-23
1091	ACTN1	SFTA1P	0.458347	1.86e-17
1441	ADH7	CTD-3116E22.8	0.402527	1.83e-13
1447	ADH7	FAM157B	0.420771	1.09e-14
1469	ADH7	LINC00640	0.618318	5.59e-34
1477	ADH7	LINC00885	0.452098	5.69e-17
1478	ADH7	LINC00896	-0.426227	4.54e-15
1485	ADH7	LINC01133	0.446495	1.52e-16
1588	ADH7	RP11-546O6.4	0.61593	1.16e-33
1590	ADH7	RP11-571L19.8	0.449471	9.02e-17
1628	ADH7	RP4-813D12.3	0.576598	8.93e-29
1767	AFAP1L2	MIR22HG	0.434225	1.22e-15
1784	AFAP1L2	RP1-93H18.1	0.434639	1.14e-15
2000	AHNAK2	GS1-600G8.5	0.428118	3.34e-15
2017	AHNAK2	LINC00640	0.431709	1.85e-15
2020	AHNAK2	LINC00705	0.455784	2.95e-17
2041	AHNAK2	MIR22HG	0.421664	9.46e-15
2058	AHNAK2	RP1-93H18.1	0.503624	2.82e-21
2576	ALDH3A1	LINC00925	0.446394	1.54e-16
2581	ALDH3A1	LINC01133	0.470335	2.06e-18
2639	ALDH3A1	RP11-311F12.1	0.645079	9.47e-38
2684	ALDH3A1	RP11-546O6.4	0.478267	4.56e-19
2724	ALDH3A1	RP4-813D12.3	0.424546	5.96e-15
2737	ALDH3A1	TP53TG1	0.402026	1.97e-13
2880	AMOTL2	RP1-93H18.1	0.401777	2.05e-13
2930	AMOTL2	RP11-375I20.6	0.657059	1.46e-39
2981	AMOTL2	RP11-890B15.2	0.411665	4.55e-14
3327	ANKRD36C	ARRDC3-AS1	0.428574	3.1e-15
3384	ANKRD36C	LINC00571	0.403497	1.58e-13
3393	ANKRD36C	LINC00843	0.479767	3.42e-19
3402	ANKRD36C	LINC01126	0.448917	9.94e-17
3445	ANKRD36C	RP11-181E10.3	0.416049	2.3e-14
3554	ANKRD36C	SALRNA1	0.410751	5.24e-14
3555	ANKRD36C	SAMD12-AS1	0.421582	9.58e-15
3948	ANO4	LINC00987	0.442994	2.77e-16
3964	ANO4	PTPRD-AS1	0.426698	4.2e-15
4119	AP2B1	AC006273.4	0.401204	2.23e-13
4120	AP2B1	AC006273.5	0.471566	1.63e-18
4209	AP2B1	LINC00640	-0.5213	6.27e-23
4265	AP2B1	RP11-168K11.3	0.464397	6.2e-18
4496	APBA1	LINC00987	0.400881	2.34e-13
4534	APBA1	RP11-135J2.3	0.415464	2.52e-14
4577	APBA1	RP11-384O8.1	0.405369	1.19e-13
4596	APBA1	RP11-474O21.5	0.434927	1.08e-15
4604	APBA1	RP11-571L19.8	0.423587	6.95e-15
4819	APLN	RP11-221N13.3	0.417959	1.7e-14
4927	APLN	SFTA1P	0.413846	3.24e-14
4942	AQP6	AC006273.5	0.477906	4.89e-19
4947	AQP6	AC011294.3	0.400673	2.41e-13
4948	AQP6	AC011298.2	0.480572	2.92e-19
4949	AQP6	AC011747.3	0.412177	4.2e-14
4976	AQP6	CASC16	0.449875	8.41e-17
4982	AQP6	CTA-363E6.2	0.554441	2.66e-26
5031	AQP6	LINC00640	-0.426191	4.56e-15
5198	AQP6	SALRNA1	0.454189	3.92e-17
6312	B3GNT3	AC006273.5	0.554882	2.38e-26
6317	B3GNT3	AC011294.3	0.411176	4.91e-14
6352	B3GNT3	CTA-363E6.2	0.58454	1.04e-29
6700	BCAR1	MIR4435-1HG	0.435297	1.02e-15
6977	C10orf107	PCAT14	0.465305	5.24e-18
6978	C10orf107	PTPRD-AS1	0.401758	2.05e-13
7042	C10orf107	RP11-384F7.2	0.409398	6.45e-14
7053	C10orf107	RP11-424M24.5	0.478825	4.1e-19
7103	C10orf107	RP4-666F24.3	0.553891	3.05e-26
8139	C20orf141	RP11-384O8.1	-0.416721	2.07e-14
8187	C20orf141	RP11-890B15.2	0.48587	1.04e-19
8215	C20orf141	SFTA1P	0.470154	2.13e-18
8230	C20orf195	AC006273.5	0.491339	3.49e-20
8270	C20orf195	CTA-363E6.2	0.437996	6.48e-16
8511	C9orf117	AC011747.3	0.421606	9.55e-15
8533	C9orf117	ARRDC3-AS1	0.445824	1.7e-16
8590	C9orf117	LINC00571	0.477231	5.57e-19
8599	C9orf117	LINC00843	0.42934	2.73e-15
8608	C9orf117	LINC01126	0.420923	1.06e-14
8639	C9orf117	RP11-110I1.12	0.458612	1.78e-17
8649	C9orf117	RP11-168K11.3	0.478066	4.74e-19
8697	C9orf117	RP11-424M24.5	0.536801	1.84e-24
8707	C9orf117	RP11-48G14.1	0.447904	1.19e-16
8732	C9orf117	RP11-862G15.1	0.442702	2.91e-16
8739	C9orf117	RP11-92J19.3	0.445914	1.68e-16
8800	C9orf84	AC115522.3	0.460339	1.3e-17
8819	C9orf84	CTA-384D8.35	0.515496	2.24e-22
8827	C9orf84	CTD-2003C8.2	0.412645	3.91e-14
8867	C9orf84	LINC00640	0.534351	3.26e-24
8883	C9orf84	LINC01133	0.407866	8.15e-14
8895	C9orf84	PCAT14	-0.424105	6.39e-15
8908	C9orf84	RP1-93H18.1	0.481184	2.6e-19
8971	C9orf84	RP11-424M24.5	-0.402843	1.74e-13
8986	C9orf84	RP11-546O6.4	0.499783	6.26e-21
9326	CAMK2N1	AC006273.5	0.440301	4.39e-16
9335	CAMK2N1	AC016735.2	0.501134	4.73e-21
9366	CAMK2N1	CTA-363E6.2	0.43203	1.75e-15
9471	CAMK2N1	RP11-168K11.3	0.446484	1.52e-16
9606	CAPSL	AC011298.2	0.464107	6.54e-18
9621	CAPSL	AC093326.3	0.421763	9.31e-15
9634	CAPSL	CASC16	0.454811	3.51e-17
9689	CAPSL	LINC00640	-0.483778	1.56e-19
9717	CAPSL	PCAT14	0.455187	3.29e-17
9757	CAPSL	RP11-274B18.4	0.463514	7.29e-18
9793	CAPSL	RP11-424M24.5	0.696861	3.13e-46
9835	CAPSL	RP11-92J19.3	0.437538	7e-16
9843	CAPSL	RP4-666F24.3	0.541113	6.7e-25
10428	CCDC42B	AC011298.2	0.458894	1.69e-17
10429	CCDC42B	AC011747.3	0.499796	6.24e-21
10456	CCDC42B	CASC16	0.49303	2.48e-20
10462	CCDC42B	CTA-363E6.2	0.514939	2.53e-22
10539	CCDC42B	PCAT14	0.42578	4.88e-15
10595	CCDC42B	RP11-344B5.2	0.420931	1.06e-14
10615	CCDC42B	RP11-424M24.5	0.524272	3.23e-23
10657	CCDC42B	RP11-92J19.3	0.456846	2.44e-17
10665	CCDC42B	RP4-666F24.3	0.406142	1.06e-13
11253	CCK	AC016735.2	0.403125	1.67e-13
11509	CD209	AC002331.1	0.528642	1.21e-23
11537	CD209	AC092580.4	0.489501	5.05e-20
11560	CD209	CTB-114C7.4	0.45764	2.12e-17
11652	CD209	RP11-10J5.1	0.532742	4.73e-24
11694	CD209	RP11-356I2.1	0.403706	1.53e-13
11737	CD209	RP11-756G20.1	0.411772	4.48e-14
11742	CD209	RP11-848P1.3	0.510489	6.6e-22
11756	CD209	RP3-369A17.4	0.425694	4.95e-15
11770	CD209	RP5-899E9.1	0.594948	5.69e-31
11780	CD209	TRBV11-2	0.491411	3.44e-20
11805	CD59	AC058791.1	0.42138	9.9e-15
11841	CD59	CTD-2003C8.2	0.402593	1.81e-13
11906	CD59	MIR4435-1HG	0.434691	1.13e-15
11984	CD59	RP11-417E7.1	0.400295	2.55e-13
12021	CD59	RP11-873E20.1	0.407587	8.51e-14
12023	CD59	RP11-890B15.2	0.531197	6.74e-24
12051	CD59	SFTA1P	0.435433	9.97e-16
12134	CDH13	FAM87A	0.458824	1.71e-17
12210	CDH13	RP11-167H9.3	0.461408	1.07e-17
12217	CDH13	RP11-221N13.3	0.481303	2.54e-19
12256	CDH13	RP11-404O13.1	0.449287	9.32e-17
12258	CDH13	RP11-417E7.1	0.442016	3.28e-16
12325	CDH13	SFTA1P	0.408989	6.87e-14
12636	CDKN2A	AC115522.3	0.44121	3.76e-16
12655	CDKN2A	CTA-384D8.35	0.62203	1.76e-34
12714	CDKN2A	LINC00925	0.56201	3.99e-27
12719	CDKN2A	LINC01133	0.430091	2.42e-15
12895	CFAP45	AC011747.3	0.420036	1.23e-14
12922	CFAP45	CASC16	0.44308	2.73e-16
12928	CFAP45	CTA-363E6.2	0.486034	1e-19
13081	CFAP45	RP11-424M24.5	0.540009	8.69e-25
13123	CFAP45	RP11-92J19.3	0.486896	8.47e-20
13131	CFAP45	RP4-666F24.3	0.505213	2.02e-21
13202	CFAP52	CTA-363E6.2	0.434014	1.26e-15
13355	CFAP52	RP11-424M24.5	0.478499	4.36e-19
13397	CFAP52	RP11-92J19.3	0.403581	1.56e-13
13405	CFAP52	RP4-666F24.3	0.449881	8.4e-17
13717	CFTR	AC011747.3	0.425381	5.2e-15
13744	CFTR	CASC16	0.441639	3.49e-16
13750	CFTR	CTA-363E6.2	0.465231	5.32e-18
13811	CFTR	LINC00954	0.41063	5.34e-14
13827	CFTR	PCAT14	0.400145	2.61e-13
14101	CHGA	PCAT14	0.49287	2.57e-20
14212	CHGA	RP11-862G15.1	0.479624	3.51e-19
14263	CHST6	AC011294.3	0.418542	1.55e-14
14264	CHST6	AC011298.2	0.400586	2.44e-13
14265	CHST6	AC011747.3	0.434519	1.16e-15
14292	CHST6	CASC16	0.424773	5.74e-15
14298	CHST6	CTA-363E6.2	0.466083	4.54e-18
14423	CHST6	RP11-321G12.1	0.414171	3.08e-14
14431	CHST6	RP11-344B5.2	0.41888	1.47e-14
14514	CHST6	SALRNA1	0.542633	4.67e-25
14532	CLCF1	AC006273.5	0.459504	1.51e-17
14545	CLCF1	AC058791.1	0.419745	1.28e-14
14572	CLCF1	CTA-363E6.2	0.419403	1.36e-14
15472	COL12A1	PTPRD-AS1	0.403437	1.59e-13
15505	COL12A1	RP11-221N13.3	0.453016	4.83e-17
15546	COL12A1	RP11-417E7.1	0.413829	3.25e-14
15779	COL4A1	RP11-221N13.3	0.445561	1.78e-16
16053	COL4A2	RP11-221N13.3	0.417945	1.71e-14
16092	COL4A2	RP11-404O13.1	0.406351	1.03e-13
16239	COL4A6	DLX2-AS1	0.41301	3.69e-14
16244	COL4A6	FAM87A	0.482936	1.85e-19
16306	COL4A6	RP1-93H18.1	0.421812	9.24e-15
16327	COL4A6	RP11-221N13.3	0.412347	4.09e-14
16368	COL4A6	RP11-417E7.1	0.471041	1.8e-18
16407	COL4A6	RP11-890B15.2	0.430725	2.18e-15
16435	COL4A6	SFTA1P	0.414483	2.94e-14
16580	CORO6	RP1-93H18.1	0.402153	1.93e-13
16642	CORO6	RP11-417E7.1	0.441245	3.74e-16
16681	CORO6	RP11-890B15.2	0.442544	2.99e-16
16730	CPNE6	AC011298.2	0.434502	1.16e-15
16825	CPNE6	LINC00954	0.430042	2.43e-15
16897	CPNE6	RP11-344B5.2	0.403267	1.64e-13
16998	CRIM1	AC006273.5	0.496577	1.21e-20
17143	CRIM1	RP11-168K11.3	0.443733	2.44e-16
17559	CSF2	AC058791.1	0.406093	1.07e-13
17690	CSF2	RP11-167H9.3	0.413073	3.66e-14
17697	CSF2	RP11-221N13.3	0.430482	2.26e-15
17738	CSF2	RP11-417E7.1	0.467327	3.61e-18
18239	CTNNAL1	RP11-168K11.3	0.474595	9.21e-19
18956	CYP21A2	CTA-363E6.2	0.408986	6.87e-14
19005	CYP21A2	LINC00640	-0.421465	9.76e-15
19320	CYP26B1	RP1-93H18.1	0.403912	1.48e-13
19382	CYP26B1	RP11-417E7.1	0.441261	3.73e-16
19556	CYP27C1	LINC00705	0.423863	6.65e-15
19594	CYP27C1	RP1-93H18.1	0.422435	8.36e-15
19835	CYP4Z1	LINC00885	0.412142	4.23e-14
20043	CYSRT1	C11orf44	0.416351	2.19e-14
20053	CYSRT1	CTA-384D8.35	0.425748	4.9e-15
20101	CYSRT1	LINC00640	0.422237	8.63e-15
20220	CYSRT1	RP11-546O6.4	0.453556	4.39e-17
20292	DCAF12L1	AC011298.2	0.421071	1.04e-14
20326	DCAF12L1	CTA-363E6.2	0.417565	1.81e-14
20403	DCAF12L1	PCAT14	0.537427	1.59e-24
20431	DCAF12L1	RP11-168K11.3	0.442363	3.09e-16
20443	DCAF12L1	RP11-274B18.4	0.423972	6.53e-15
20479	DCAF12L1	RP11-424M24.5	0.427261	3.84e-15
20711	DCUN1D5	RP11-221N13.3	0.401428	2.15e-13
20752	DCUN1D5	RP11-417E7.1	0.430329	2.32e-15
20819	DCUN1D5	SFTA1P	0.4256	5.02e-15
20840	DDO	AC011298.2	0.410422	5.51e-14
21192	DIO3	LINC00524	0.465815	4.77e-18
21915	DLL1	SFTA1P	0.426216	4.55e-15
22211	DNAI1	AC011747.3	0.425444	5.15e-15
22238	DNAI1	CASC16	0.516696	1.72e-22
22244	DNAI1	CTA-363E6.2	0.470928	1.84e-18
22293	DNAI1	LINC00640	-0.495232	1.59e-20
22321	DNAI1	PCAT14	0.435451	9.94e-16
22349	DNAI1	RP11-168K11.3	0.411839	4.43e-14
22361	DNAI1	RP11-274B18.4	0.43144	1.93e-15
22397	DNAI1	RP11-424M24.5	0.63014	1.34e-35
22407	DNAI1	RP11-48G14.1	0.42258	8.17e-15
22432	DNAI1	RP11-862G15.1	0.407373	8.79e-14
22439	DNAI1	RP11-92J19.3	0.444453	2.16e-16
22447	DNAI1	RP4-666F24.3	0.516276	1.89e-22
22743	DNAJC5B	AC002331.1	0.46905	2.62e-18
22794	DNAJC5B	CTB-114C7.4	0.442159	3.2e-16
22886	DNAJC5B	RP11-10J5.1	0.630238	1.3e-35
22901	DNAJC5B	RP11-212I21.2	0.520338	7.75e-23
22971	DNAJC5B	RP11-756G20.1	0.482353	2.07e-19
22976	DNAJC5B	RP11-848P1.3	0.582881	1.64e-29
22990	DNAJC5B	RP3-369A17.4	0.459527	1.51e-17
23004	DNAJC5B	RP5-899E9.1	0.704561	1.2e-47
23014	DNAJC5B	TRBV11-2	0.503745	2.75e-21
23032	DNALI1	AC011298.2	0.515737	2.13e-22
23033	DNALI1	AC011747.3	0.534885	2.88e-24
23040	DNALI1	AC068134.6	0.406676	9.77e-14
23047	DNALI1	AC093326.3	0.428692	3.04e-15
23060	DNALI1	CASC16	0.571633	3.32e-28
23066	DNALI1	CTA-363E6.2	0.522144	5.2e-23
23115	DNALI1	LINC00640	-0.514434	2.82e-22
23143	DNALI1	PCAT14	0.540881	7.07e-25
23171	DNALI1	RP11-168K11.3	0.495694	1.45e-20
23183	DNALI1	RP11-274B18.4	0.484652	1.32e-19
23219	DNALI1	RP11-424M24.5	0.569711	5.5e-28
23254	DNALI1	RP11-862G15.1	0.428617	3.07e-15
23261	DNALI1	RP11-92J19.3	0.45094	6.97e-17
23269	DNALI1	RP4-666F24.3	0.47877	4.14e-19
23299	DOK7	AC006273.4	0.452785	5.03e-17
23300	DOK7	AC006273.5	0.562081	3.91e-27
23340	DOK7	CTA-363E6.2	0.466202	4.44e-18
23389	DOK7	LINC00640	-0.436618	8.17e-16
23398	DOK7	LINC00896	0.413949	3.19e-14
23445	DOK7	RP11-168K11.3	0.441019	3.88e-16
23567	DPCR1	AC004870.3	0.404221	1.42e-13
24164	EMR2	CTB-114C7.4	0.556943	1.43e-26
24381	EMR2	SFTA1P	0.403657	1.54e-13
24401	ENKUR	AC011294.3	0.419891	1.25e-14
24436	ENKUR	CTA-363E6.2	0.40816	7.8e-14
24482	ENKUR	LINC00571	0.41094	5.09e-14
24541	ENKUR	RP11-168K11.3	0.407744	8.31e-14
24589	ENKUR	RP11-424M24.5	0.447998	1.17e-16
24639	ENKUR	RP4-666F24.3	0.415145	2.65e-14
24683	EREG	AC058791.1	0.411299	4.82e-14
24821	EREG	RP11-221N13.3	0.423919	6.59e-15
25637	FAM167A	RP11-168K11.3	0.474792	8.87e-19
25883	FAM216B	PCAT14	0.425436	5.16e-15
25923	FAM216B	RP11-274B18.4	0.506725	1.47e-21
25952	FAM216B	RP11-395E19.6	0.469814	2.27e-18
25959	FAM216B	RP11-424M24.5	0.556773	1.49e-26
25994	FAM216B	RP11-862G15.1	0.414944	2.73e-14
26009	FAM216B	RP4-666F24.3	0.635505	2.33e-36
26732	FGF5	RP11-167H9.3	0.43387	1.29e-15
26739	FGF5	RP11-221N13.3	0.523536	3.81e-23
26778	FGF5	RP11-404O13.1	0.456349	2.67e-17
26780	FGF5	RP11-417E7.1	0.477669	5.12e-19
26819	FGF5	RP11-890B15.2	0.46195	9.7e-18
26847	FGF5	SFTA1P	0.570304	4.71e-28
27451	FOSL1	CTA-384D8.35	0.454625	3.63e-17
27472	FOSL1	CTD-3252C9.4	0.447854	1.2e-16
27499	FOSL1	LINC00640	0.401819	2.03e-13
27540	FOSL1	RP1-93H18.1	0.419755	1.28e-14
27602	FOSL1	RP11-417E7.1	0.4382	6.26e-16
27690	FOXJ1	AC011298.2	0.408274	7.66e-14
27691	FOXJ1	AC011747.3	0.425178	5.38e-15
27718	FOXJ1	CASC16	0.437847	6.65e-16
27724	FOXJ1	CTA-363E6.2	0.540606	7.55e-25
27773	FOXJ1	LINC00640	-0.444042	2.31e-16
27877	FOXJ1	RP11-424M24.5	0.429898	2.49e-15
28337	FUT3	LINC01133	0.426346	4.45e-15
28513	GABRB2	AC011747.3	0.445497	1.8e-16
28540	GABRB2	CASC16	0.402833	1.75e-13
28607	GABRB2	LINC00954	0.411553	4.63e-14
28778	GAS2	AC005592.1	0.457468	2.18e-17
28787	GAS2	AC011747.3	0.454665	3.61e-17
28881	GAS2	LINC00954	0.44851	1.07e-16
28983	GAS2	RP11-48G14.1	0.46142	1.07e-17
29417	GCK	LINC00640	0.466311	4.35e-18
29651	GCNT4	CTD-2003C8.2	0.486858	8.53e-20
29670	GCNT4	FAM87A	0.444122	2.28e-16
29691	GCNT4	LINC00640	0.407118	9.14e-14
29715	GCNT4	MIR22HG	0.428619	3.07e-15
29732	GCNT4	RP1-93H18.1	0.433416	1.39e-15
29916	GDA	CTA-363E6.2	0.41737	1.87e-14
30234	GLDC	LINC00524	0.41275	3.85e-14
30686	GPR15	TRBV11-2	0.410933	5.09e-14
31049	GSTM2	LINC00092	0.4971	1.09e-20
31074	GSTM2	LINC00987	0.415531	2.49e-14
31108	GSTM2	RP11-1134I14.8	0.400553	2.45e-13
31310	GULP1	EIF3J-AS1	0.408465	7.44e-14
32237	HIST1H2AJ	RP11-329L6.2	0.428554	3.11e-15
33400	HIST1H2BO	RP11-932O9.10	0.406238	1.04e-13
33863	HMGA2	RP11-221N13.3	0.578791	4.97e-29
34020	HNF1B	CASC16	0.404322	1.4e-13
34026	HNF1B	CTA-363E6.2	0.545392	2.41e-25
34075	HNF1B	LINC00640	-0.43311	1.47e-15
34083	HNF1B	LINC00885	-0.468033	3.16e-18
34131	HNF1B	RP11-168K11.3	0.414559	2.9e-14
34143	HNF1B	RP11-274B18.4	0.489324	5.23e-20
34179	HNF1B	RP11-424M24.5	0.406835	9.54e-14
34265	HOXB1	AC011294.3	0.40213	1.94e-13
34360	HOXB1	LINC00925	0.434399	1.18e-15
34468	HOXB1	RP11-546O6.4	0.461344	1.08e-17
34556	HPSE	AC115522.3	0.497896	9.22e-21
34634	HPSE	LINC00925	0.517049	1.6e-22
34639	HPSE	LINC01133	0.409363	6.49e-14
35073	IFITM3	AC002331.1	0.480154	3.17e-19
35101	IFITM3	AC092580.4	0.514931	2.53e-22
35123	IFITM3	CTA-384D8.35	0.45652	2.59e-17
35196	IFITM3	MIR4435-1HG	0.450704	7.27e-17
35470	IL11	MIR4435-1HG	0.423362	7.21e-15
35548	IL11	RP11-417E7.1	0.471319	1.71e-18
35587	IL11	RP11-890B15.2	0.468341	2.99e-18
35615	IL11	SFTA1P	0.417133	1.94e-14
35945	IL18	CTA-384D8.35	0.404093	1.44e-13
36018	IL18	MIR4435-1HG	0.432409	1.65e-15
36135	IL18	RP11-890B15.2	0.408146	7.81e-14
36457	INPP4B	AC011294.3	0.405696	1.13e-13
36599	INPP4B	RP11-181E10.3	0.415119	2.66e-14
36991	IRF7	AC002331.1	0.455579	3.06e-17
37019	IRF7	AC092580.4	0.533494	3.97e-24
37041	IRF7	CTA-384D8.35	0.587283	4.89e-30
37539	ISG15	AC002331.1	0.43857	5.88e-16
37567	ISG15	AC092580.4	0.417271	1.9e-14
37589	ISG15	CTA-384D8.35	0.572583	2.59e-28
37662	ISG15	MIR4435-1HG	0.434408	1.18e-15
37922	KCNS1	LINC00925	0.553449	3.4e-26
38102	KIF12	AC011298.2	0.441606	3.51e-16
38130	KIF12	CASC16	0.502115	3.86e-21
38136	KIF12	CTA-363E6.2	0.44426	2.23e-16
38181	KIF12	LINC00543	0.472295	1.42e-18
38185	KIF12	LINC00640	-0.411987	4.33e-14
38194	KIF12	LINC00896	0.486275	9.57e-20
38241	KIF12	RP11-168K11.3	0.425231	5.33e-15
38253	KIF12	RP11-274B18.4	0.445538	1.79e-16
38456	KL	LINC00571	0.431023	2.07e-15
38472	KL	LINC00987	0.43927	5.23e-16
39035	KLK3	PCAT14	0.558011	1.09e-26
39568	LAMA2	LINC00987	0.480956	2.71e-19
39584	LAMA2	PTPRD-AS1	0.526701	1.87e-23
39586	LAMA2	RP1-137D17.1	0.422753	7.95e-15
39661	LAMA2	RP11-439M11.1	0.441651	3.49e-16
40197	LHFPL1	RP11-384O8.1	0.434207	1.22e-15
40842	LINC01207	AC011298.2	0.465709	4.87e-18
40843	LINC01207	AC011747.3	0.460739	1.21e-17
40870	LINC01207	CASC16	0.682861	9.17e-44
40876	LINC01207	CTA-363E6.2	0.566755	1.18e-27
40925	LINC01207	LINC00640	-0.411318	4.8e-14
40953	LINC01207	PCAT14	0.508853	9.35e-22
41139	LMO7	ARRDC3-AS1	0.423325	7.25e-15
41196	LMO7	LINC00571	0.400999	2.3e-13
41205	LMO7	LINC00843	0.414862	2.77e-14
41425	LY6K	CTA-384D8.35	0.509848	7.56e-22
41484	LY6K	LINC00925	0.407227	8.99e-14
41938	MAP3K19	AC011298.2	0.40901	6.85e-14
41966	MAP3K19	CASC16	0.523326	3.99e-23
41972	MAP3K19	CTA-363E6.2	0.444828	2.02e-16
42021	MAP3K19	LINC00640	-0.421711	9.39e-15
42049	MAP3K19	PCAT14	0.421303	1e-14
42089	MAP3K19	RP11-274B18.4	0.448671	1.04e-16
42125	MAP3K19	RP11-424M24.5	0.661603	2.84e-40
42167	MAP3K19	RP11-92J19.3	0.499175	7.09e-21
42175	MAP3K19	RP4-666F24.3	0.573259	2.17e-28
42580	MESP2	LINC00925	0.484342	1.4e-19
42803	MICALCL	CTD-2003C8.2	0.41766	1.79e-14
42884	MICALCL	RP1-93H18.1	0.476051	6.98e-19
42905	MICALCL	RP11-221N13.3	0.418792	1.49e-14
42907	MICALCL	RP11-253E3.3	0.489258	5.3e-20
43027	MISP	AC006273.4	0.522753	4.54e-23
43028	MISP	AC006273.5	0.632666	5.91e-36
43068	MISP	CTA-363E6.2	0.546281	1.95e-25
43117	MISP	LINC00640	-0.435728	9.49e-16
43617	MOCOS	CTA-384D8.35	0.477213	5.59e-19
43911	MSGN1	CTD-3116E22.8	0.465078	5.47e-18
43939	MSGN1	LINC00640	0.466694	4.06e-18
43958	MSGN1	LINC01258	0.431431	1.94e-15
44124	MSLNL	AC006273.5	0.50783	1.16e-21
44164	MSLNL	CTA-363E6.2	0.449885	8.39e-17
44398	MUC16	AC006273.5	0.509047	8.97e-22
44403	MUC16	AC011294.3	0.424713	5.8e-15
44438	MUC16	CTA-363E6.2	0.520959	6.76e-23
44951	MUC4	AC011294.3	0.428196	3.29e-15
45046	MUC4	LINC00925	0.408793	7.08e-14
45051	MUC4	LINC01133	0.450128	8.04e-17
45753	MYL2	SFTA1P	0.421387	9.89e-15
46076	MYO7B	CASC16	0.477034	5.78e-19
46082	MYO7B	CTA-363E6.2	0.488515	6.14e-20
46127	MYO7B	LINC00543	0.456709	2.5e-17
46187	MYO7B	RP11-168K11.3	0.403178	1.66e-13
46199	MYO7B	RP11-274B18.4	0.421648	9.48e-15
46365	MYOF	CTD-2003C8.2	0.402306	1.89e-13
46383	MYOF	FAM157B	0.409319	6.53e-14
46411	MYOF	LINC00843	0.421746	9.33e-15
46412	MYOF	LINC00863	0.429255	2.77e-15
46429	MYOF	MIR22HG	0.436216	8.74e-16
46446	MYOF	RP1-93H18.1	0.528889	1.14e-23
46469	MYOF	RP11-253E3.3	0.52516	2.65e-23
46496	MYOF	RP11-375I20.6	0.408475	7.43e-14
46849	NALCN	SFTA1P	0.408048	7.93e-14
46905	NAPRT	CTA-384D8.35	0.452562	5.24e-17
47530	NRXN1	PTPRD-AS1	0.411187	4.9e-14
47539	NRXN1	RP1-79C4.4	0.406528	9.99e-14
47685	NXNL2	AC006273.4	0.484548	1.35e-19
47686	NXNL2	AC006273.5	0.467847	3.27e-18
47700	NXNL2	AC068134.6	0.463132	7.82e-18
47726	NXNL2	CTA-363E6.2	0.423921	6.59e-15
47750	NXNL2	EIF3J-AS1	0.410818	5.19e-14
47831	NXNL2	RP11-168K11.3	0.435953	9.14e-16
47880	NXNL2	RP11-430B1.2	0.401886	2.01e-13
47929	NXNL2	RP4-666F24.3	0.431821	1.82e-15
48049	OTUD7A	LINC00640	0.50171	4.2e-21
48168	OTUD7A	RP11-546O6.4	0.402511	1.83e-13
48302	P2RX6	FAM87A	0.465234	5.31e-18
48465	P2RX6	RP11-890B15.2	0.456155	2.76e-17
48499	P2RY6	AC002331.1	0.407254	8.95e-14
48549	P2RY6	CTA-384D8.35	0.439274	5.22e-16
48550	P2RY6	CTB-114C7.4	0.444835	2.02e-16
48739	P2RY6	RP11-890B15.2	0.410608	5.36e-14
49151	PCDHGA9	LINC00843	0.429589	2.62e-15
49152	PCDHGA9	LINC00863	0.431299	1.98e-15
49191	PCDHGA9	RP11-110I1.12	0.4068	9.59e-14
49209	PCDHGA9	RP11-253E3.3	0.421424	9.83e-15
49432	PCDHGB7	LINC00987	0.401778	2.04e-13
49604	PDE4A	AC006273.5	0.452254	5.53e-17
49644	PDE4A	CTA-363E6.2	0.45114	6.73e-17
49702	PDE4A	LINC00896	0.468276	3.02e-18
50008	PDZD2	RP1-93H18.1	0.416312	2.21e-14
50383	PEAR1	RP11-890B15.2	0.405773	1.12e-13
50523	PHGDH	LINC00885	0.434183	1.23e-15
50764	PHYHD1	EIF3J-AS1	0.405722	1.13e-13
51023	PLK2	CTD-2003C8.2	0.468426	2.94e-18
51104	PLK2	RP1-93H18.1	0.4443	2.21e-16
51166	PLK2	RP11-417E7.1	0.400296	2.55e-13
51205	PLK2	RP11-890B15.2	0.494266	1.93e-20
51233	PLK2	SFTA1P	0.447876	1.19e-16
51795	PRKCG	AC006273.4	0.454902	3.46e-17
51796	PRKCG	AC006273.5	0.460987	1.16e-17
51802	PRKCG	AC011298.2	0.40222	1.91e-13
51836	PRKCG	CTA-363E6.2	0.462264	9.16e-18
51885	PRKCG	LINC00640	-0.479046	3.93e-19
51897	PRKCG	LINC00954	0.410165	5.73e-14
51941	PRKCG	RP11-168K11.3	0.479733	3.44e-19
51962	PRKCG	RP11-326C3.13	0.404645	1.33e-13
52019	PRKCG	RP11-834C11.4	0.417609	1.8e-14
52076	PROM1	AC011298.2	0.510499	6.58e-22
52077	PROM1	AC011747.3	0.512419	4.36e-22
52091	PROM1	AC093326.3	0.400445	2.49e-13
52104	PROM1	CASC16	0.601834	7.85e-32
52110	PROM1	CTA-363E6.2	0.535414	2.55e-24
52159	PROM1	LINC00640	-0.557942	1.11e-26
52171	PROM1	LINC00954	0.419887	1.26e-14
52187	PROM1	PCAT14	0.560985	5.17e-27
52215	PROM1	RP11-168K11.3	0.440266	4.41e-16
52227	PROM1	RP11-274B18.4	0.462896	8.16e-18
52263	PROM1	RP11-424M24.5	0.471072	1.79e-18
52343	PROSER2	AC006273.4	0.529093	1.09e-23
52344	PROSER2	AC006273.5	0.54711	1.6e-25
52603	PROSER2	SFTA1P	0.436292	8.63e-16
53719	PTPRH	AC011294.3	0.478001	4.8e-19
53754	PTPRH	CTA-363E6.2	0.481566	2.41e-19
54037	PTRF	CTD-2003C8.2	0.445205	1.89e-16
54056	PTRF	FAM87A	0.435753	9.45e-16
54102	PTRF	MIR4435-1HG	0.405773	1.12e-13
54132	PTRF	RP11-167H9.3	0.410071	5.82e-14
54139	PTRF	RP11-221N13.3	0.495091	1.64e-20
54178	PTRF	RP11-404O13.1	0.44367	2.47e-16
54180	PTRF	RP11-417E7.1	0.547327	1.51e-25
54219	PTRF	RP11-890B15.2	0.525042	2.72e-23
54247	PTRF	SFTA1P	0.532612	4.87e-24
54268	PYGL	AC011298.2	-0.480757	2.82e-19
54269	PYGL	AC011747.3	-0.426811	4.13e-15
54292	PYGL	C10orf91	0.425841	4.83e-15
54293	PYGL	C11orf44	0.412337	4.1e-14
54334	PYGL	GS1-600G8.5	0.432867	1.53e-15
54351	PYGL	LINC00640	0.426227	4.54e-15
54354	PYGL	LINC00705	0.450035	8.17e-17
54392	PYGL	RP1-93H18.1	0.505601	1.86e-21
54454	PYGL	RP11-417E7.1	0.451999	5.78e-17
54493	PYGL	RP11-890B15.2	0.498262	8.56e-21
54536	PYROXD2	AC006273.5	0.464436	6.15e-18
54543	PYROXD2	AC011747.3	0.413567	3.39e-14
54576	PYROXD2	CTA-363E6.2	0.439223	5.27e-16
54600	PYROXD2	EIF3J-AS1	0.401495	2.13e-13
55367	RASGRF1	AC016735.2	0.438697	5.76e-16
55673	RASSF10	CTA-384D8.35	0.429609	2.61e-15
57120	RPRM	PTPRD-AS1	0.41889	1.47e-14
57333	RTN1	CTD-2341M24.1	0.400477	2.48e-13
57378	RTN1	LINC00987	0.434051	1.25e-15
57410	RTN1	RP11-10J5.1	0.416416	2.17e-14
57500	RTN1	RP11-848P1.3	0.456975	2.39e-17
57528	RTN1	RP5-899E9.1	0.475324	8.01e-19
57538	RTN1	TRBV11-2	0.404642	1.33e-13
57652	RXFP1	LINC00987	0.405752	1.12e-13
57843	SAA1	AC092580.4	0.407616	8.47e-14
57865	SAA1	CTA-384D8.35	0.446113	1.62e-16
58104	SCGB1D2	AC011298.2	0.438207	6.25e-16
58132	SCGB1D2	CASC16	0.472523	1.36e-18
58215	SCGB1D2	PCAT14	0.491208	3.59e-20
58291	SCGB1D2	RP11-424M24.5	0.45577	2.96e-17
58933	SH2D5	AC058791.1	0.408689	7.19e-14
58944	SH2D5	AF064858.11	0.419924	1.25e-14
58971	SH2D5	CTD-2128A3.2	0.420992	1.05e-14
58988	SH2D5	FAM87A	0.452768	5.05e-17
58992	SH2D5	GS1-600G8.5	0.438396	6.06e-16
59019	SH2D5	LINC00911	0.45047	7.57e-17
59071	SH2D5	RP11-221N13.3	0.496338	1.27e-20
59110	SH2D5	RP11-404O13.1	0.424047	6.45e-15
59112	SH2D5	RP11-417E7.1	0.542222	5.15e-25
59151	SH2D5	RP11-890B15.2	0.503251	3.04e-21
59179	SH2D5	SFTA1P	0.531535	6.24e-24
59312	SHANK1	PTPRD-AS1	0.427166	3.9e-15
59748	SLC28A2	AC011298.2	0.411959	4.35e-14
59749	SLC28A2	AC011747.3	0.410839	5.17e-14
59756	SLC28A2	AC068134.6	0.417539	1.82e-14
59776	SLC28A2	CASC16	0.554457	2.65e-26
59782	SLC28A2	CTA-363E6.2	0.50577	1.8e-21
60247	SLC35F3	RP11-890B15.2	0.423837	6.68e-15
60275	SLC35F3	SFTA1P	0.476114	6.89e-19
60295	SLC44A4	AC011294.3	0.493653	2.19e-20
60296	SLC44A4	AC011298.2	0.547283	1.53e-25
60297	SLC44A4	AC011747.3	0.539802	9.13e-25
60324	SLC44A4	CASC16	0.595277	5.19e-31
60330	SLC44A4	CTA-363E6.2	0.629139	1.85e-35
60391	SLC44A4	LINC00954	0.443715	2.45e-16
60407	SLC44A4	PCAT14	0.425245	5.32e-15
60463	SLC44A4	RP11-344B5.2	0.466838	3.95e-18
60493	SLC44A4	RP11-48G14.1	0.400353	2.53e-13
60546	SLC44A4	SALRNA1	0.413404	3.48e-14
60852	SLC5A5	AC068134.6	0.457315	2.24e-17
60878	SLC5A5	CTA-363E6.2	0.403397	1.6e-13
61133	SLC5A8	AC093326.3	0.452738	5.08e-17
61146	SLC5A8	CASC16	0.455902	2.89e-17
61520	SLC6A12	RP11-10J5.1	0.411636	4.57e-14
61610	SLC6A12	RP11-848P1.3	0.449627	8.78e-17
61638	SLC6A12	RP5-899E9.1	0.424979	5.55e-15
62482	SPDEF	AC006273.5	0.527087	1.72e-23
62488	SPDEF	AC011298.2	0.440227	4.44e-16
62489	SPDEF	AC011747.3	0.402286	1.9e-13
62496	SPDEF	AC068134.6	0.439704	4.86e-16
62516	SPDEF	CASC16	0.556281	1.68e-26
62522	SPDEF	CTA-363E6.2	0.661995	2.46e-40
62571	SPDEF	LINC00640	-0.541388	6.27e-25
62599	SPDEF	PCAT14	0.468093	3.13e-18
62738	SPDEF	SALRNA1	0.402577	1.81e-13
63148	SPON1	PTPRD-AS1	0.505145	2.05e-21
63393	SRRM3	LINC00640	0.570267	4.75e-28
63565	SRRM3	TP53TG1	0.433679	1.34e-15
63768	SSC4D	RP11-404O13.1	0.474293	9.75e-19
63837	SSC4D	SFTA1P	0.500179	5.76e-21
64440	SYT5	CTA-363E6.2	0.413234	3.57e-14
64776	TCEAL2	LINC00987	0.444258	2.23e-16
64792	TCEAL2	PTPRD-AS1	0.542413	4.92e-25
64795	TCEAL2	RP1-170O19.14	0.411984	4.33e-14
64869	TCEAL2	RP11-439M11.1	0.415534	2.49e-14
64988	TEKT1	CTA-363E6.2	0.433528	1.37e-15
65105	TEKT1	RP11-274B18.4	0.405238	1.22e-13
65141	TEKT1	RP11-424M24.5	0.554089	2.9e-26
65191	TEKT1	RP4-666F24.3	0.51921	9.94e-23
65526	TGFA	C10orf91	0.406788	9.61e-14
65609	TGFA	MIR22HG	0.42347	7.08e-15
65770	TMC5	AC006273.5	0.468768	2.76e-18
65775	TMC5	AC011294.3	0.467846	3.28e-18
65776	TMC5	AC011298.2	0.429903	2.49e-15
65777	TMC5	AC011747.3	0.444765	2.04e-16
65804	TMC5	CASC16	0.532741	4.73e-24
65810	TMC5	CTA-363E6.2	0.777467	8.63e-64
65859	TMC5	LINC00640	-0.471459	1.67e-18
66713	TMEM215	RP1-170O19.14	0.425984	4.72e-15
66787	TMEM215	RP11-439M11.1	0.402325	1.88e-13
68734	TSPAN33	RP11-848P1.3	0.445059	1.94e-16
68762	TSPAN33	RP5-899E9.1	0.413961	3.19e-14
68967	TSPAN7	RP11-384O8.1	0.453403	4.51e-17
68994	TSPAN7	RP11-571L19.8	0.428806	2.98e-15
69032	TSPAN7	RP4-813D12.3	0.428711	3.03e-15
69253	TWIST2	RP11-439M11.1	0.41843	1.58e-14
69606	VAV2	AC006273.5	0.445666	1.75e-16
70659	VGLL3	RP11-890B15.2	0.404274	1.41e-13
70687	VGLL3	SFTA1P	0.473448	1.14e-18
71256	VWA3A	AC011298.2	0.484906	1.25e-19
71257	VWA3A	AC011747.3	0.444058	2.31e-16
71284	VWA3A	CASC16	0.542982	4.3e-25
71290	VWA3A	CTA-363E6.2	0.503068	3.16e-21
71339	VWA3A	LINC00640	-0.422539	8.22e-15
71351	VWA3A	LINC00954	0.402672	1.79e-13
71367	VWA3A	PCAT14	0.503075	3.16e-21
71407	VWA3A	RP11-274B18.4	0.471354	1.7e-18
71443	VWA3A	RP11-424M24.5	0.699586	9.99e-47
71485	VWA3A	RP11-92J19.3	0.474783	8.88e-19
71493	VWA3A	RP4-666F24.3	0.529478	9.98e-24
71624	WNT3A	LINC00925	0.406165	1.06e-13
71807	WNT7A	AC016735.2	0.45539	3.17e-17
72161	XG	LINC00640	0.547306	1.52e-25
72460	ZBED2	MIR4435-1HG	0.433611	1.35e-15
72522	ZBED2	RP11-356I2.1	0.409817	6.05e-14
72577	ZBED2	RP11-890B15.2	0.406862	9.5e-14
72893	ZG16	AC006273.4	0.454275	3.87e-17
72894	ZG16	AC006273.5	0.425088	5.46e-15
73492	ZNF662	CTD-2005H7.2	0.412488	4.01e-14
73543	ZNF662	LINC00954	0.410845	5.16e-14
